# Supplementary material for: Synthesis, crystal structure, theoretical calculation and cytotoxic effect of new Pt(ii), Pd(ii) and Cu(ii) complexes with pyridine-pyrazoles derivatives
Source: Royal Society of Chemistry journal article supplement (doi:10.1039/b808301k), 2008-01-01
Supplement: b808301k.pdf [file b808301k.pdf]

## Supporting Information

**Table 1S.** Bond distances (Å) and angles (°) of complexes **3** and **5**

| <b>3</b> |           |             |            | <b>5</b>            |            |                         |            |
|----------|-----------|-------------|------------|---------------------|------------|-------------------------|------------|
| Pd-Cl1   | 2.2754(7) | Cl1-Pd-Cl2  | 88.96(3)   | Cu-N3               | 1.995(3)   | N3-Cu-N2                | 78.51(10)  |
| Pd-Cl2   | 2.2780(8) | Cl1-Pd-N1   | 177.28(6)  | Cu-N2               | 2.088(3)   | N3-Cu-Cl2               | 172.31(8)  |
| Pd-N1    | 2.036(2)  | Cl1-Pd-N3   | 97.80(6)   | Cu-Cl2              | 2.2308(9)  | N2-Cu-Cl2               | 94.97(7)   |
| Pd-N3    | 2.044(2)  | Cl2-Pd-N1   | 93.39(6)   | Cu-Cl1              | 2.2509(10) | N3-Cu-Cl1               | 93.20(8)   |
| O1-C12   | 1.382(4)  | Cl2-Pd-N3   | 172.33(6)  | Cu-Cl2 <sup>i</sup> | 2.6727(10) | N2-Cu-Cl1               | 150.21(8)  |
| O1-C13   | 1.397(3)  | N1-Pd-N3    | 79.95(8)   | Cl2-Cu <sup>i</sup> | 2.6727(10) | Cl2-Cu-Cl1              | 94.48(4)   |
| O2-C13   | 1.197(4)  | C12-O1-C13  | 123.9(2)   | O1-C16              | 1.374(4)   | N3-Cu-Cl2 <sup>i</sup>  | 87.43(8)   |
| N1-C1    | 1.345(3)  | Pd-N1-C1    | 125.17(17) | O1-C15              | 1.387(4)   | N2-Cu-Cl2 <sup>i</sup>  | 106.94(8)  |
| N1-C5    | 1.333(3)  | Pd-N1-C5    | 114.24(17) | O2-C16              | 1.201(4)   | Cl2-Cu-Cl2 <sup>i</sup> | 90.63(3)   |
| N2-N3    | 1.402(3)  | C1-N1-C5    | 119.2(2)   | N1-C8               | 1.362(4)   | Cl1-Cu-Cl2 <sup>i</sup> | 101.14(3)  |
| N2-C5    | 1.399(3)  | N3-N2-C5    | 115.3(2)   | N1-N2               | 1.392(4)   | Cu-Cl2-Cu <sup>i</sup>  | 89.37(3)   |
| N2-C6    | 1.359(3)  | N3-N2-C6    | 110.2(2)   | N1-C5               | 1.425(4)   | C16-O1-C15              | 123.2(3)   |
| N3-C15   | 1.333(4)  | C5-N2-C6    | 133.5(2)   | N2-C6               | 1.333(4)   | C8-N1-N2                | 110.7(2)   |
| C1-C2    | 1.378(4)  | Pd-N3-N2    | 108.85(14) | N3-C5               | 1.336(4)   | C8-N1-C5                | 131.7(3)   |
| C2-C3    | 1.376(4)  | Pd-N3-C15   | 141.22(18) | N3-C1               | 1.343(4)   | N2-N1-C5                | 114.7(2)   |
| C3-C4    | 1.373(4)  | N2-N3-C15   | 106.8(2)   | C1-C2               | 1.381(5)   | C6-N2-N1                | 106.5(3)   |
| C4-C5    | 1.391(4)  | N1-C1-C2    | 121.3(2)   | C2-C3               | 1.380(5)   | C6-N2-Cu                | 143.0(2)   |
| C6-C7    | 1.440(4)  | C1-C2-C3    | 119.1(3)   | C3-C4               | 1.384(5)   | N1-N2-Cu                | 108.20(18) |
| C6-C14   | 1.380(4)  | C2-C3-C4    | 120.0(3)   | C4-C5               | 1.366(5)   | C5-N3-C1                | 117.9(3)   |
| C7-C8    | 1.407(4)  | C3-C4-C5    | 117.8(3)   | C6-C7               | 1.421(5)   | C5-N3-Cu                | 117.4(2)   |
| C7-C12   | 1.400(4)  | N1-C5-N2    | 114.5(2)   | C6-C9               | 1.479(5)   | C1-N3-Cu                | 123.9(2)   |
| C8-C9    | 1.381(4)  | N1-C5-C4    | 122.3(3)   | C7-C8               | 1.382(5)   | N3-C1-C2                | 121.8(3)   |
| C9-C10   | 1.380(5)  | N2-C5-C4    | 122.9(2)   | C7-C16              | 1.444(5)   | C3-C2-C1                | 119.2(3)   |
| C10-C11  | 1.366(6)  | N2-C6-C7    | 131.7(3)   | C8-C10              | 1.439(5)   | C2-C3-C4                | 119.0(3)   |
| C11-C12  | 1.396(4)  | N2-C6-C14   | 106.2(2)   | C10-C11             | 1.402(5)   | C5-C4-C3                | 118.1(3)   |
| C13-C14  | 1.441(4)  | C7-C6-C14   | 122.0(2)   | C10-C15             | 1.404(5)   | N3-C5-C4                | 123.8(3)   |
| C14-C15  | 1.412(4)  | C6-C7-C8    | 127.5(3)   | C11-C12             | 1.371(5)   | N3-C5-N1                | 112.8(3)   |
| C15-C16  | 1.475(4)  | C6-C7-C12   | 114.5(3)   | C12-C13             | 1.397(5)   | C4-C5-N1                | 123.2(3)   |
|          |           | C8-C7-C12   | 117.8(3)   | C13-C14             | 1.355(6)   | N2-C6-C7                | 109.2(3)   |
|          |           | C7-C8-C9    | 120.1(3)   | C14-C15             | 1.386(5)   | N2-C6-C9                | 123.6(3)   |
|          |           | C8-C9-C10   | 120.4(3)   |                     |            | C7-C6-C9                | 127.1(3)   |
|          |           | C9-C10-C11  | 121.1(3)   |                     |            | C8-C7-C6                | 107.0(3)   |
|          |           | C10-C11-C12 | 118.9(3)   |                     |            | C8-C7-C16               | 121.6(3)   |
|          |           | O1-C12-C7   | 122.4(2)   |                     |            | C6-C7-C16               | 131.4(3)   |

|             |          |             |          |
|-------------|----------|-------------|----------|
| O1-C12-C11  | 116.3(2) | N1-C8-C7    | 106.4(3) |
| C7-C12-C11  | 121.3(3) | N1-C8-C10   | 131.6(3) |
| O1-C13-O2   | 117.3(3) | C7-C8-C10   | 121.6(3) |
| O1-C13-C14  | 113.9(2) | C11-C10-C15 | 117.7(3) |
| O2-C13-C14  | 128.8(3) | C11-C10-C8  | 127.6(3) |
| C6-C14-C13  | 122.0(2) | C15-C10-C8  | 114.3(3) |
| C6-C14-C15  | 107.9(2) | C12-C11-C10 | 121.1(4) |
| C13-C14-C15 | 129.9(3) | C11-C12-C13 | 119.7(4) |
| N3-C15-C14  | 108.7(2) | C14-C13-C12 | 120.4(4) |
| N3-C15-C16  | 123.1(3) | C13-C14-C15 | 120.3(4) |
| C14-C15-C16 | 128.2(3) | C14-C15-O1  | 116.6(3) |
|             |          | C14-C15-C1  | 120.6(3) |
|             |          | O1-C15-C1   | 122.8(3) |
|             |          | O2-C16-O1   | 117.8(3) |
|             |          | O2-C16-C7   | 127.2(3) |
|             |          | O1-C16-C7   | 115.0(3) |
